# Supplementary material for: DBAASP v3: database of antimicrobial/cytotoxic activity and structure of peptides as a resource for development of new therapeutics
Source: PubMed Central journal article supplement — Nucleic Acids Res. 2020 Nov 5;49(D1):D288–97. doi: 10.1093/nar/gkaa991 (PMC7778994; doi:10.1093/nar/gkaa991), 2020-11-05
Supplement: gkaa991_supplemental_file.pdf [file gkaa991_supplemental_file.pdf]

### General Data

ID(s)

Name

Sequence

Full Sequence  Part Of Sequence

Sequence Length

Complexity

Synthesis Type

Uniprot ID

### Chemical structure

N Terminus

C Terminus

Unusual Amino Acid

[Search](#)

Showing 1 to 30 of 2,732 entries

| ID  | Name                                 | N terminus | Sequence                                     | C terminus | View                 |
|-----|--------------------------------------|------------|----------------------------------------------|------------|----------------------|
| 11  | Cathelicidin-1, CATH-1, Fowlicidin-1 |            | RVKRVWPLVIRTVIAGYNLYRAIKKK                   |            | <a href="#">View</a> |
| 14  | Brevinin-2 related peptide B2RP      |            | GIWDTIKSMGKVFAGKILQNL                        | AMD        | <a href="#">View</a> |
| 15  | Histatin 5                           |            | DSHAKRHHGYKRRKFHEKHSHRGY                     |            | <a href="#">View</a> |
| 16  | Distinctin chain 1                   |            | ENREVPFGTALIKLRCKII                          |            | <a href="#">View</a> |
| 36  | Distinctin chain 2                   |            | NLVSLIEARKYLEQLHRKLNCKV                      |            | <a href="#">View</a> |
| 37  | PGLa                                 |            | GMASKAGAIAKIAKVALKAL                         | AMD        | <a href="#">View</a> |
| 54  | Halocidin subunit B                  |            | ALLHHGLNCAKGVLA                              | AMD        | <a href="#">View</a> |
| 55  | Halocidin subunit A                  |            | WLNALLHHGLNCAKGVLA                           | AMD        | <a href="#">View</a> |
| 57  | Tenecin-1                            |            | VTCDILSVEAKGVKLNDAACAACHCLFRGRSGGYCNGKRVCVCR |            | <a href="#">View</a> |
| 160 | Tritrpticin                          |            | VRRFPWWWWPFLRR                               |            | <a href="#">View</a> |
| 360 | Magainin-2                           |            | GIGKFLHSAKFGKAFVGEIMNS                       |            | <a href="#">View</a> |
| 461 | Drosomycin                           |            | DCLSGRYKGPCAVWDNETCRRVCKE EGRSSGHCSPLKWCCEGC |            | <a href="#">View</a> |
| 462 | Gastric inhibitory polypeptide (GIP) |            | ISDYSIAMDKIRQQDFVNWLLAQKGGKSDWKHNITQ         |            | <a href="#">View</a> |

Figure S1 . Screenshot of the “Search” page

Physicochemical features of AMP, such as hydrophobicity, charge, amphipathicity, predisposition to interaction with cell envelope and so on, determine the mode of action. Physicochemical features are determined by amino acid sequences, for example, by amino acid compositions and distribution of particular amino acids along the chain. Mode of action determined by amino acid compositions and distributions can be different. So, it's interesting to know differences in amino acid compositions and distributions along the chain between different groups of AMPs, for example: between linear and non-linear; between long (> 25 aa) and short (< 15 aa); between AMPs that are active against different species; etc. Current tool relying on DBAASP data allows to perform such assessments for sequences consisting of not modified amino acids. The parameter "Minimal Peptide count" means a threshold for which statistics will not be assessed. User can choose convenient value of threshold. The default value equals 100;

Amino acid composition of peptides from DBAASP

Comparative analysis of AMP composition

Amino acid composition of peptides from DBAASP relative to UniProt

Sequence Length

empty or 2- or -100 or 2-200

Synthesis Type

Ribosomal

Intrachain Bond

All

Target Group

All

Pathogens

All

Minimal Peptide count

100

Found 2714 peptide(s)

Load

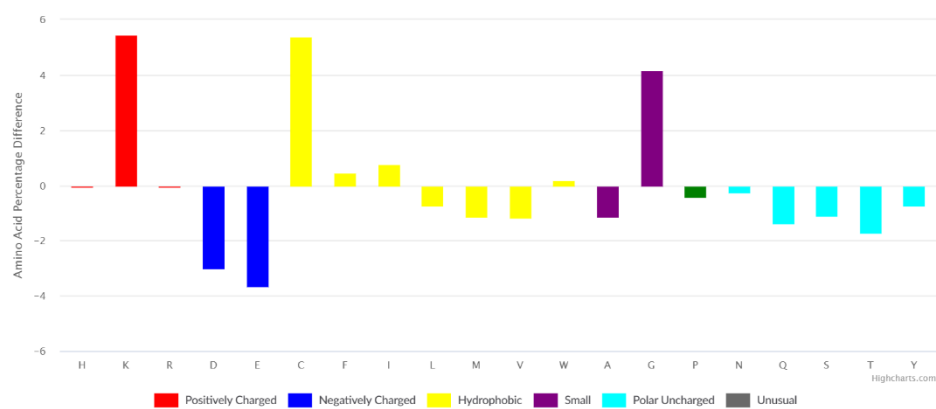

Distributions of i-spaced amino acid pairs

Figure S2. Screenshot of the subpage of the “Statistics” titled “Comparative analysis of AMP composition”

Distribution of the values of Physicochemical characteristics for the sets of peptides from DBAASP

A desired characteristic has to be chosen at the menu "Physicochemical Characteristics", to build a distribution of the values of corresponding characteristic for the sets of peptides defined by different values of parameters: "sequence length", "synthesis type", "target group" and "bond".

Sequence Length

empty or 2- or -100 or 2-200

Synthesis Type

Ribosomal

Intrachain Bond

All

Target Group

All

Pathogens

All

Minimal Peptide count

100

Physicochemical Characteristics

Isoelectric Point

Found 2612 peptide(s)

Load

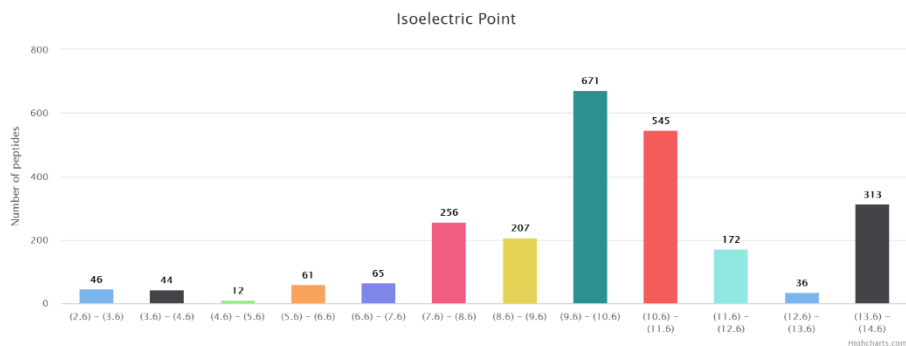

Figure S3. Screenshot of the subpage of the "Statistics" titled "Distribution of Physicochemical characteristics"

a)

Sequence Length  
empty or 2- or -100 or 2-200

Synthesis Type  
All Rectangular Snp

Intrachain Bond  
All

Target Group  
All

Pathogens  
All

Type of Task  
X

Choose Symbols  
L I V F

[reset symbols](#)

Minimal Peptide count  
100

[Load](#)

b)

Sequence Length  
empty or 2- or -100 or 2-200

Synthesis Type  
Ribosomal Rectangular Snp

Intrachain Bond  
All

Target Group  
All

Pathogens  
All

Type of Task  
XY

Choose Symbols  
R K

Choose Symbols  
W

[reset symbols](#)

Minimal Peptide count  
100

[Load](#)

**Figure S4. Screenshots of the subpage of the “statistics” titled “Distribution of i-spaced amino acid pairs” for two different options of the parameters from the drop-down menu of the "type of task": a) when X option is selected and b) when XY option is selected**
